# Supplementary material for: A nascent protein labeling strategy disclosed mitochondrial proteomic responses in punicalagin intervened insulin resistance of HepG2 cells
Source: Royal Society of Chemistry journal article supplement (doi:10.1039/d1fo02749b), 2021-12-15
Supplement: d1fo02749b1.pdf [file d1fo02749b1.pdf]

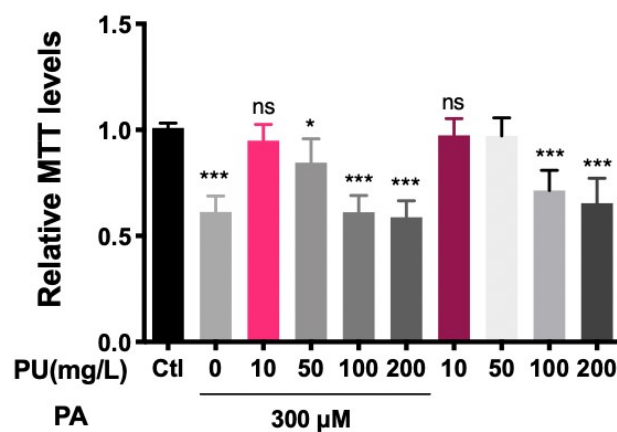

**Supplement Figure 1.** MTT level of PU treatment under different concentrations with 300  $\mu$ M

PA (\* $P < 0.05$ , \*\* $P < 0.01$ , \*\*\* $P < 0.001$ .)

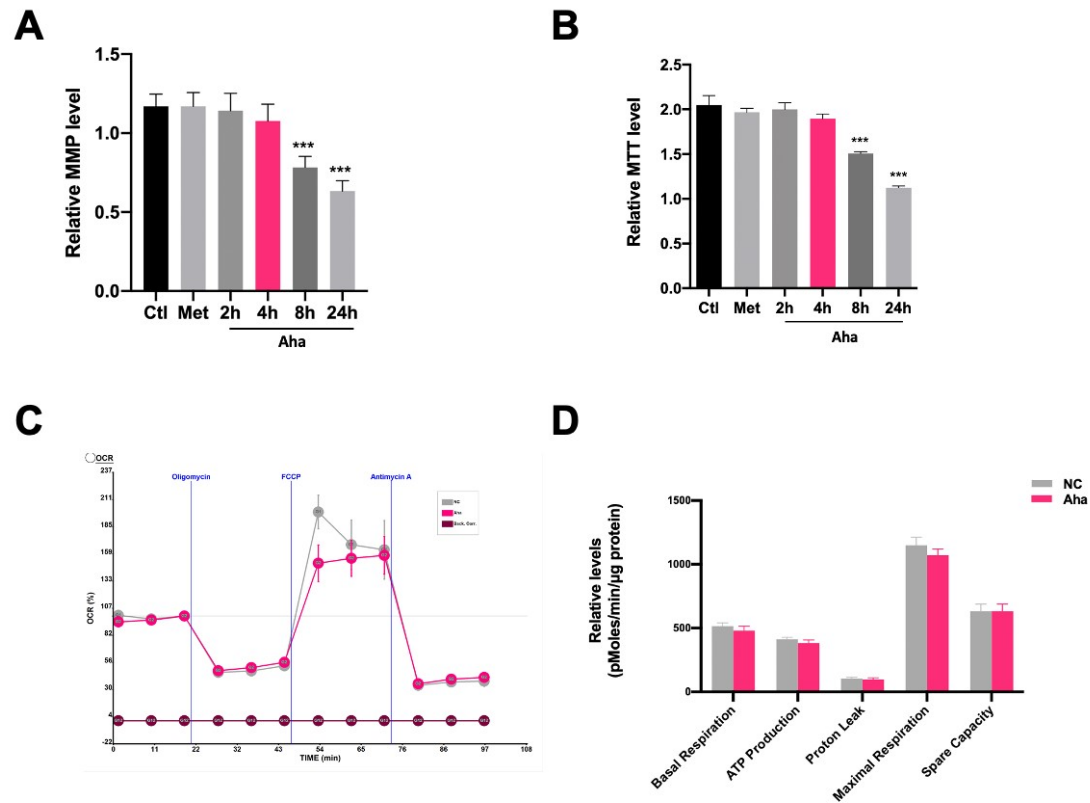

**Supplement Figure 2.** The effect of Aha treatment to HepG2 cells. (A-B): MMP and MTT of Aha treatment HepG2 cells in different time courses. (C-D): The OCR analysis of mitochondrial function after Aha treatment. (\*\*\*)  $P < 0.001$ .

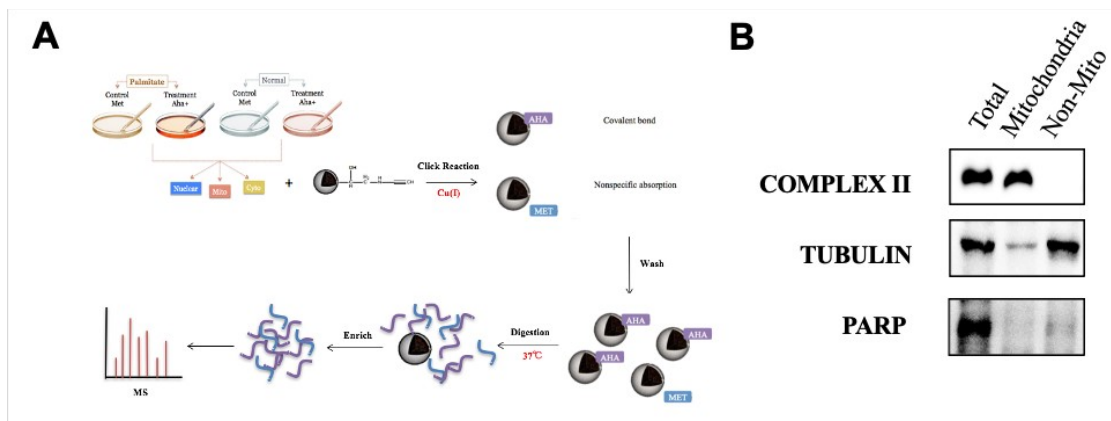

**Supplement Figure 3.** The sketch of experiment flow (A). Western Blot of cell fractionation, marked as total, mitochondria and other parts (B).

**A**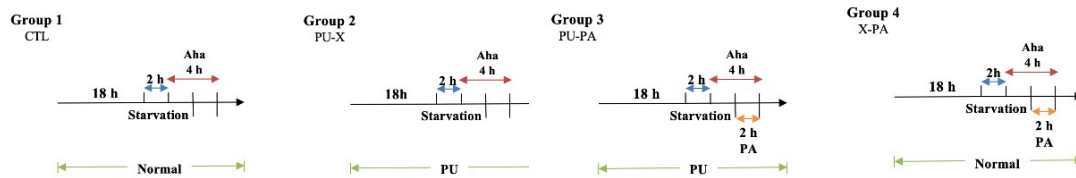**B**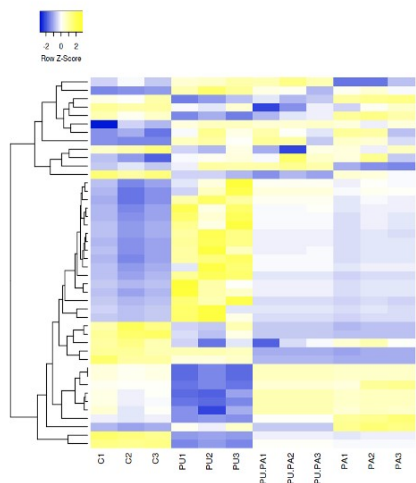**C**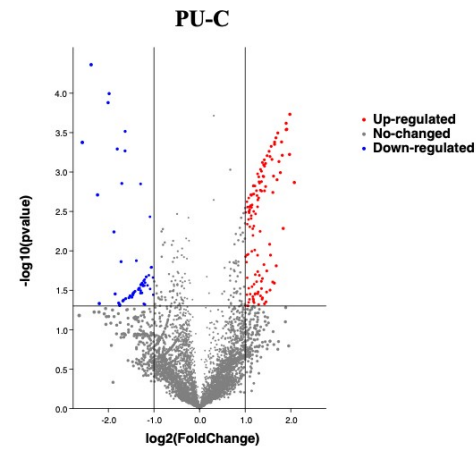**D**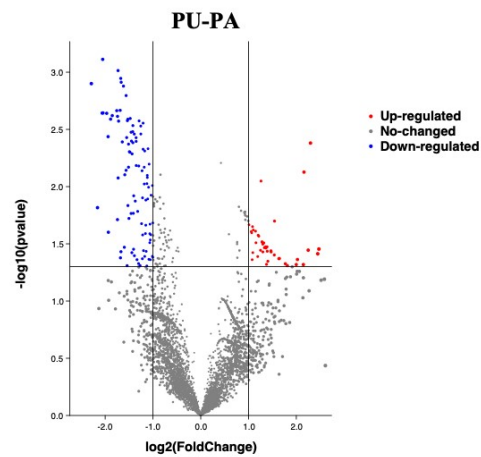**E**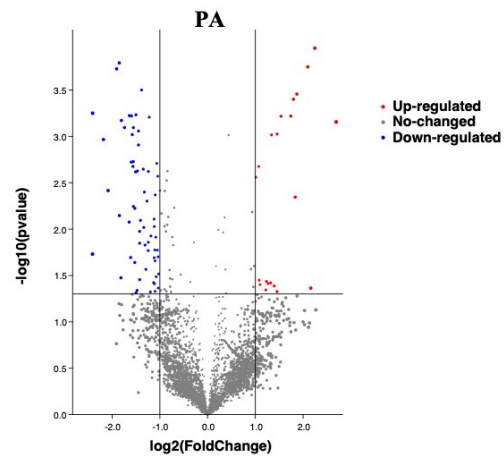

**Supplement Figure 4.** The sketch of experiment flow (A). The global mitochondrial proteomic changes (B). The volcano charts of each pair (C-E). (mean  $\pm$  SEM,  $n = 3$ ,  $*P < 0.05$ ).

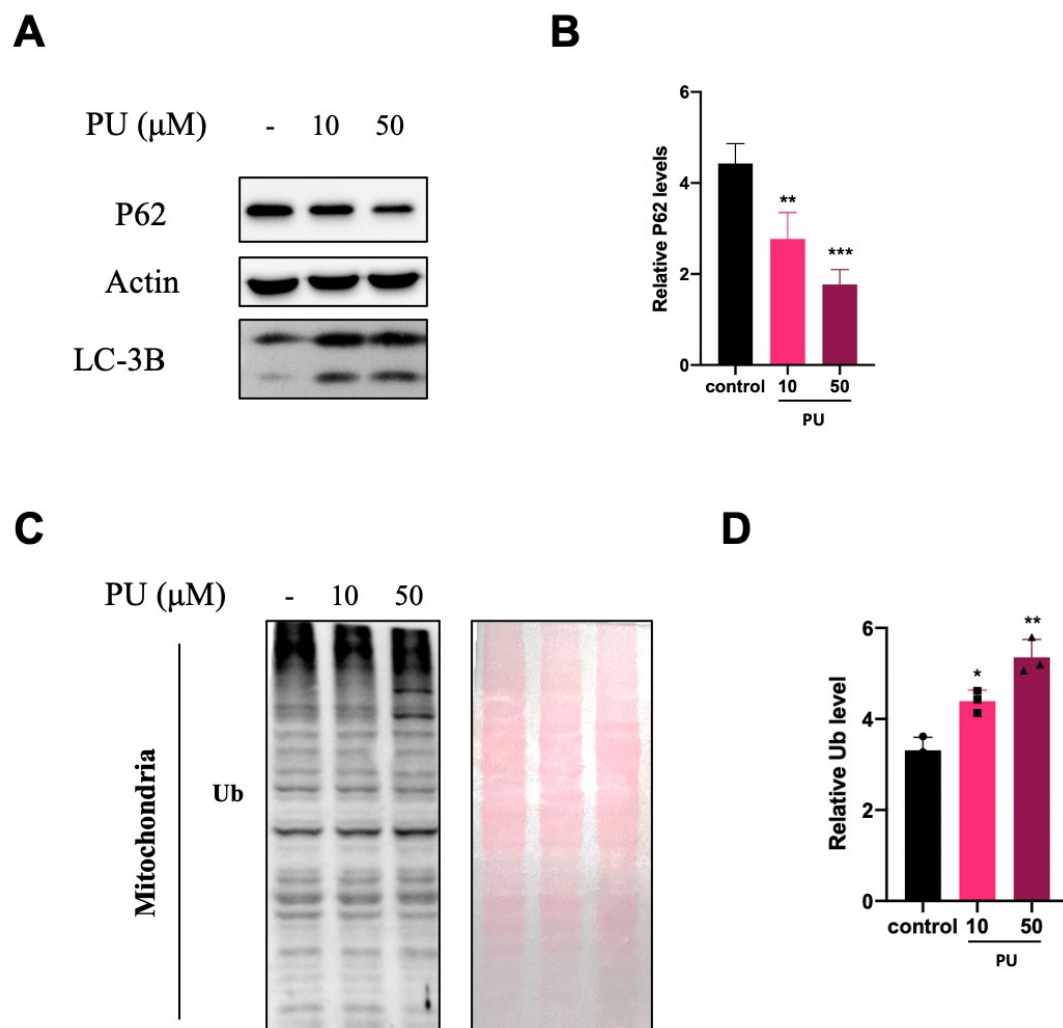

**Supplement Figure 5.** Western Blot of p62 and LC3B under 10  $\mu$ M and 50  $\mu$ M PU (A).

Analysis result of p62 (B). Relative ubiquitin levels 10  $\mu$ M and 50  $\mu$ M PU (C). (Data are mean  $\pm$  SEM of 3 independent experiments, \* $P$  < 0.05, \*\* $P$  < 0.01).
